# Supplementary material
Source: publisher site journal article supplement (https://www.dovepress.com/article/597629)
Supplement: Supplementary file 1 [file 597629_supplementary%20files%20CLEAN.docx]

| **Supplementary Materials 1. Defining Variable Calibration Points.** | | | |
| --- | --- | --- | --- |
| Variable | Full in | Crossover point | Full out |
| Social frailty | Scores ≥3 were coded as 1 (SF); Scores ＜3 were coded as 0 (~SF). | | |
| Family function | 7 | 6 | 4 |
| Depression | 14 | 10 | 6 |
| Life space | 66 | 59.5 | 54 |
| Age | 78 | 73 | 68 |
| Exercise frequency | 5 | 4 | 3 |
| Education level | Scores =3 were coded as 1 (EL); Scores <3 were coded as 0 (~EL). | | |
| Residential area | Rural area=0; Urban area=1. | | |
| *Note:* Calibration thresholds for continuous variables were set using P75, P50, and P25 values. SF=social frailty; EL=education level. “~” indicates the absence of a condition. | | | |

| **Supplementary Materials 2. Robustness Test** | | | |
| --- | --- | --- | --- |
| Solution | Raw coverage | Unique coverage | Consistency |
| ~EL*RA*~FF*DE*~LS*~EF | 0.324 | 0.159 | 0.873 |
| RA*~FF*DE*~LS*Age*~EF | 0.233 | 0.067 | 0.892 |
| EL*~RA*~FF*DE*~LS*~Age*~EF | 0.036 | 0.036 | 0.947 |
| Solution coverage | 0.428 | | |
| Solution consistency | 0.893 | | |
| *Note:* DE=depression; EF=exercise frequency; EL=education level; FF=family function; LS=life space; RA=residential area; SF=social frailty. “*” indicates the logical AND between conditions; “~” indicates the absence of a condition. | | | |
